# Supplementary material for: Functional and Morphological Differences of Muscle Mitochondria in Chronic Fatigue Syndrome and Post-COVID Syndrome
Source: MDPI journal article supplement (doi:10.3390/ijms25031675), 2024-01-30
Supplement: s1 [file s1]

## Supplementary Table S1

*Intercorrelation between electron microscopy (EM) and oxidative phosphorylation (OXPHOS) parameters. All statistical parameters are included.*

MA\_Coupled: Maximal Activity coupled; MA\_Uncoupled: Maximal Activity uncoupled; CA\_I Complex I Activity; CA\_II Complex II Activity; CA\_IV Complex IV Activity; Form\_I\_m: Form of intermyofibrillar mitochondria; Form\_S\_m Form of subsarcolemmal mitochondria; CriSco\_I\_m: Cristae score intermyofibrillar mitochondria; CriSco\_S\_m: Cristae score of subsarcolemmal mitochondria; smD\_I\_m: smallest diameter intermyofibrillar mitochondria; smD\_S\_m: smallest diameter subsarcolemmal mitochondria; meD\_I\_m: mean diameter intermyofibrillar mitochondria; meD\_S\_m: mean diameter subsarcolemmal mitochondria; Dia\_I\_m: perimeter intermyofibrillar mitochondria; Dia\_S\_m: perimeter subsarcolemmal mitochondria; AreaMito\_I\_m: area intermyofibrillar mitochondria; AreaMito\_S\_m: area subsarcolemmal mitochondria; AreaMitoTotal\_I\_m: area of all intermyofibrillar mitochondria; AreaMitoTotal\_S\_m: area of all subsarcolemmal mitochondria; Vol\_I\_m: volume intermyofibrillar mitochondria; Vol\_S\_m: volume subsarcolemmal mitochondria; Sar\_I\_m: sarcomere length muscle; IB\_I\_m: I-band length muscle; AB\_I\_m: A-band length muscle; Mito\_Vol%\_Mus\_Total: volume percent of mitochondria in all muscle; Mito\_Vol%\_Mus\_I: volume percent of mitochondria in all intermyofibrillar muscle; Mito\_Vol%\_Mus\_S: volume percent of mitochondria in subsarcolemmal muscle

| Parameter 1  | Parameter 2         | r      | CI_low | CI_high | t      | df | N  | p     | p <sub>fdr</sub> |
|--------------|---------------------|--------|--------|---------|--------|----|----|-------|------------------|
| MA_Coupled   | MA_Uncoupled        | 0.975  | 0.952  | 0.987   | 26.622 | 37 | 39 | 0.000 | 0.000            |
| MA_Coupled   | CA_I                | 0.865  | 0.755  | 0.927   | 10.477 | 37 | 39 | 0.000 | 0.000            |
| MA_Coupled   | CA_II               | 0.834  | 0.706  | 0.909   | 9.319  | 38 | 40 | 0.000 | 0.000            |
| MA_Coupled   | CA_IV               | 0.839  | 0.714  | 0.912   | 9.503  | 38 | 40 | 0.000 | 0.000            |
| MA_Coupled   | Form_I_m            | 0.198  | -0.197 | 0.537   | 1.007  | 25 | 27 | 0.323 | 0.535            |
| MA_Coupled   | Form_S_m            | 0.010  | -0.371 | 0.389   | 0.050  | 25 | 27 | 0.960 | 0.977            |
| MA_Coupled   | CriSco_I_m          | -0.091 | -0.456 | 0.299   | -0.459 | 25 | 27 | 0.650 | 0.806            |
| MA_Coupled   | CriSco_S_m          | -0.287 | -0.602 | 0.104   | -1.500 | 25 | 27 | 0.146 | 0.367            |
| MA_Coupled   | smD_I_m             | 0.022  | -0.361 | 0.399   | 0.110  | 25 | 27 | 0.913 | 0.948            |
| MA_Coupled   | smD_S_m             | -0.053 | -0.425 | 0.334   | -0.266 | 25 | 27 | 0.792 | 0.895            |
| MA_Coupled   | meD_I_m             | -0.026 | -0.402 | 0.357   | -0.130 | 25 | 27 | 0.897 | 0.943            |
| MA_Coupled   | meD_S_m             | -0.134 | -0.489 | 0.259   | -0.675 | 25 | 27 | 0.506 | 0.690            |
| MA_Coupled   | Dia_I_m             | 0.084  | -0.306 | 0.450   | 0.422  | 25 | 27 | 0.676 | 0.824            |
| MA_Coupled   | Dia_S_m             | 0.000  | -0.380 | 0.380   | 0.000  | 25 | 27 | 1.000 | 1.000            |
| MA_Coupled   | AreaMito_I_m        | -0.043 | -0.416 | 0.342   | -0.217 | 25 | 27 | 0.830 | 0.905            |
| MA_Coupled   | AreaMito_S_m        | -0.177 | -0.522 | 0.218   | -0.897 | 25 | 27 | 0.378 | 0.567            |
| MA_Coupled   | AreaMitoTotal_I_m   | 0.049  | -0.337 | 0.421   | 0.246  | 25 | 27 | 0.807 | 0.895            |
| MA_Coupled   | AreaMitoTotal_S_m   | -0.342 | -0.639 | 0.044   | -1.820 | 25 | 27 | 0.081 | 0.248            |
| MA_Coupled   | Vol_I_m             | -0.185 | -0.528 | 0.210   | -0.941 | 25 | 27 | 0.356 | 0.554            |
| MA_Coupled   | Vol_S_m             | -0.344 | -0.640 | 0.042   | -1.830 | 25 | 27 | 0.079 | 0.246            |
| MA_Coupled   | Sar_I_m             | 0.029  | -0.355 | 0.404   | 0.144  | 25 | 27 | 0.887 | 0.940            |
| MA_Coupled   | IB_I_m              | 0.230  | -0.164 | 0.561   | 1.182  | 25 | 27 | 0.248 | 0.486            |
| MA_Coupled   | AB_I_m              | -0.023 | -0.399 | 0.361   | -0.113 | 25 | 27 | 0.911 | 0.948            |
| MA_Coupled   | Mito_Vol%_Mus_Total | -0.333 | -0.633 | 0.054   | -1.767 | 25 | 27 | 0.089 | 0.271            |
| MA_Coupled   | Mito_Vol%_Mus_I     | -0.185 | -0.528 | 0.210   | -0.941 | 25 | 27 | 0.356 | 0.554            |
| MA_Coupled   | Mito_Vol%_Mus_S     | -0.344 | -0.640 | 0.042   | -1.830 | 25 | 27 | 0.079 | 0.246            |
| MA_Uncoupled | CA_I                | 0.893  | 0.802  | 0.943   | 11.894 | 36 | 38 | 0.000 | 0.000            |
| MA_Uncoupled | CA_II               | 0.807  | 0.660  | 0.895   | 8.327  | 37 | 39 | 0.000 | 0.000            |
| MA_Uncoupled | CA_IV               | 0.814  | 0.671  | 0.899   | 8.520  | 37 | 39 | 0.000 | 0.000            |

| Parameter 1  | Parameter 2         | r      | CI_low | CI_high | t      | df | N  | p     | $p_{\text{fdr}}$ |
|--------------|---------------------|--------|--------|---------|--------|----|----|-------|------------------|
| MA_Uncoupled | Form_I_m            | 0.122  | -0.278 | 0.486   | 0.602  | 24 | 26 | 0.553 | 0.717            |
| MA_Uncoupled | Form_S_m            | -0.120 | -0.485 | 0.280   | -0.594 | 24 | 26 | 0.558 | 0.717            |
| MA_Uncoupled | CriSco_I_m          | -0.117 | -0.482 | 0.283   | -0.576 | 24 | 26 | 0.570 | 0.730            |
| MA_Uncoupled | CriSco_S_m          | -0.317 | -0.628 | 0.080   | -1.639 | 24 | 26 | 0.114 | 0.321            |
| MA_Uncoupled | smD_I_m             | -0.053 | -0.432 | 0.341   | -0.262 | 24 | 26 | 0.796 | 0.895            |
| MA_Uncoupled | smD_S_m             | -0.095 | -0.465 | 0.304   | -0.467 | 24 | 26 | 0.645 | 0.802            |
| MA_Uncoupled | meD_I_m             | -0.123 | -0.487 | 0.278   | -0.607 | 24 | 26 | 0.550 | 0.717            |
| MA_Uncoupled | meD_S_m             | -0.189 | -0.537 | 0.214   | -0.945 | 24 | 26 | 0.354 | 0.554            |
| MA_Uncoupled | Dia_I_m             | 0.019  | -0.371 | 0.403   | 0.091  | 24 | 26 | 0.928 | 0.961            |
| MA_Uncoupled | Dia_S_m             | -0.030 | -0.412 | 0.362   | -0.146 | 24 | 26 | 0.885 | 0.940            |
| MA_Uncoupled | AreaMito_I_m        | -0.151 | -0.509 | 0.251   | -0.748 | 24 | 26 | 0.462 | 0.656            |
| MA_Uncoupled | AreaMito_S_m        | -0.242 | -0.575 | 0.161   | -1.220 | 24 | 26 | 0.234 | 0.472            |
| MA_Uncoupled | AreaMitoTotal_I_m   | 0.013  | -0.376 | 0.398   | 0.064  | 24 | 26 | 0.949 | 0.971            |
| MA_Uncoupled | AreaMitoTotal_S_m   | -0.351 | -0.650 | 0.042   | -1.839 | 24 | 26 | 0.078 | 0.246            |
| MA_Uncoupled | Vol_I_m             | -0.249 | -0.580 | 0.154   | -1.257 | 24 | 26 | 0.221 | 0.461            |
| MA_Uncoupled | Vol_S_m             | -0.354 | -0.652 | 0.039   | -1.852 | 24 | 26 | 0.076 | 0.246            |
| MA_Uncoupled | Sar_I_m             | -0.068 | -0.444 | 0.328   | -0.334 | 24 | 26 | 0.741 | 0.858            |
| MA_Uncoupled | IB_I_m              | 0.232  | -0.170 | 0.569   | 1.170  | 24 | 26 | 0.253 | 0.486            |
| MA_Uncoupled | AB_I_m              | -0.143 | -0.503 | 0.258   | -0.709 | 24 | 26 | 0.485 | 0.681            |
| MA_Uncoupled | Mito_Vol%_Mus_Total | -0.360 | -0.656 | 0.032   | -1.892 | 24 | 26 | 0.071 | 0.236            |
| MA_Uncoupled | Mito_Vol%_Mus_I     | -0.247 | -0.579 | 0.156   | -1.247 | 24 | 26 | 0.224 | 0.463            |
| MA_Uncoupled | Mito_Vol%_Mus_S     | -0.354 | -0.652 | 0.039   | -1.852 | 24 | 26 | 0.076 | 0.246            |
| CA_I         | CA_II               | 0.682  | 0.467  | 0.821   | 5.671  | 37 | 39 | 0.000 | 0.000            |
| CA_I         | CA_IV               | 0.655  | 0.428  | 0.804   | 5.271  | 37 | 39 | 0.000 | 0.000            |
| CA_I         | Form_I_m            | 0.205  | -0.190 | 0.543   | 1.047  | 25 | 27 | 0.305 | 0.518            |
| CA_I         | Form_S_m            | -0.157 | -0.507 | 0.237   | -0.796 | 25 | 27 | 0.434 | 0.624            |
| CA_I         | CriSco_I_m          | -0.108 | -0.468 | 0.284   | -0.541 | 25 | 27 | 0.594 | 0.755            |
| CA_I         | CriSco_S_m          | -0.271 | -0.590 | 0.122   | -1.406 | 25 | 27 | 0.172 | 0.403            |
| CA_I         | smD_I_m             | 0.058  | -0.329 | 0.428   | 0.289  | 25 | 27 | 0.775 | 0.886            |
| CA_I         | smD_S_m             | 0.024  | -0.359 | 0.400   | 0.121  | 25 | 27 | 0.905 | 0.948            |
| CA_I         | meD_I_m             | 0.078  | -0.311 | 0.445   | 0.390  | 25 | 27 | 0.700 | 0.833            |
| CA_I         | meD_S_m             | -0.104 | -0.466 | 0.287   | -0.524 | 25 | 27 | 0.605 | 0.761            |
| CA_I         | Dia_I_m             | 0.187  | -0.208 | 0.529   | 0.951  | 25 | 27 | 0.351 | 0.554            |
| CA_I         | Dia_S_m             | 0.046  | -0.340 | 0.418   | 0.228  | 25 | 27 | 0.821 | 0.904            |
| CA_I         | AreaMito_I_m        | 0.003  | -0.377 | 0.383   | 0.016  | 25 | 27 | 0.987 | 0.999            |
| CA_I         | AreaMito_S_m        | -0.080 | -0.447 | 0.309   | -0.403 | 25 | 27 | 0.690 | 0.830            |
| CA_I         | AreaMitoTotal_I_m   | 0.097  | -0.294 | 0.460   | 0.487  | 25 | 27 | 0.631 | 0.788            |
| CA_I         | AreaMitoTotal_S_m   | -0.242 | -0.569 | 0.152   | -1.246 | 25 | 27 | 0.224 | 0.463            |
| CA_I         | Vol_I_m             | -0.125 | -0.482 | 0.267   | -0.632 | 25 | 27 | 0.533 | 0.706            |
| CA_I         | Vol_S_m             | -0.252 | -0.577 | 0.142   | -1.301 | 25 | 27 | 0.205 | 0.442            |

| Parameter 1 | Parameter 2         | r      | CI_low | CI_high | t      | df | N  | p     | $p_{\text{fdr}}$ |
|-------------|---------------------|--------|--------|---------|--------|----|----|-------|------------------|
| CA_I        | Sar_I_m             | 0.180  | -0.214 | 0.524   | 0.917  | 25 | 27 | 0.368 | 0.560            |
| CA_I        | IB_I_m              | 0.385  | 0.006  | 0.668   | 2.088  | 25 | 27 | 0.047 | 0.172            |
| CA_I        | AB_I_m              | 0.162  | -0.233 | 0.510   | 0.819  | 25 | 27 | 0.420 | 0.612            |
| CA_I        | Mito_Vol%_Mus_Total | -0.229 | -0.561 | 0.165   | -1.178 | 25 | 27 | 0.250 | 0.486            |
| CA_I        | Mito_Vol%_Mus_I     | -0.128 | -0.485 | 0.265   | -0.646 | 25 | 27 | 0.524 | 0.702            |
| CA_I        | Mito_Vol%_Mus_S     | -0.252 | -0.577 | 0.142   | -1.301 | 25 | 27 | 0.205 | 0.442            |
| CA_II       | CA_IV               | 0.700  | 0.497  | 0.830   | 6.043  | 38 | 40 | 0.000 | 0.000            |
| CA_II       | Form_I_m            | 0.293  | -0.098 | 0.606   | 1.534  | 25 | 27 | 0.138 | 0.363            |
| CA_II       | Form_S_m            | 0.131  | -0.262 | 0.487   | 0.660  | 25 | 27 | 0.516 | 0.693            |
| CA_II       | CriSco_I_m          | 0.001  | -0.379 | 0.381   | 0.004  | 25 | 27 | 0.997 | 1.000            |
| CA_II       | CriSco_S_m          | -0.188 | -0.530 | 0.206   | -0.959 | 25 | 27 | 0.347 | 0.554            |
| CA_II       | smD_I_m             | 0.049  | -0.337 | 0.421   | 0.245  | 25 | 27 | 0.808 | 0.895            |
| CA_II       | smD_S_m             | -0.012 | -0.390 | 0.370   | -0.058 | 25 | 27 | 0.954 | 0.974            |
| CA_II       | meD_I_m             | 0.067  | -0.321 | 0.436   | 0.337  | 25 | 27 | 0.739 | 0.858            |
| CA_II       | meD_S_m             | -0.028 | -0.404 | 0.356   | -0.141 | 25 | 27 | 0.889 | 0.940            |
| CA_II       | Dia_I_m             | 0.111  | -0.280 | 0.472   | 0.561  | 25 | 27 | 0.580 | 0.740            |
| CA_II       | Dia_S_m             | 0.030  | -0.354 | 0.405   | 0.148  | 25 | 27 | 0.883 | 0.940            |
| CA_II       | AreaMito_I_m        | -0.002 | -0.382 | 0.378   | -0.010 | 25 | 27 | 0.992 | 1.000            |
| CA_II       | AreaMito_S_m        | -0.106 | -0.467 | 0.286   | -0.531 | 25 | 27 | 0.600 | 0.760            |
| CA_II       | AreaMitoTotal_I_m   | 0.068  | -0.320 | 0.437   | 0.340  | 25 | 27 | 0.736 | 0.858            |
| CA_II       | AreaMitoTotal_S_m   | -0.219 | -0.553 | 0.176   | -1.121 | 25 | 27 | 0.273 | 0.494            |
| CA_II       | Vol_I_m             | -0.180 | -0.524 | 0.215   | -0.915 | 25 | 27 | 0.369 | 0.560            |
| CA_II       | Vol_S_m             | -0.220 | -0.553 | 0.175   | -1.126 | 25 | 27 | 0.271 | 0.494            |
| CA_II       | Sar_I_m             | 0.083  | -0.307 | 0.449   | 0.416  | 25 | 27 | 0.681 | 0.825            |
| CA_II       | IB_I_m              | 0.044  | -0.342 | 0.417   | 0.221  | 25 | 27 | 0.827 | 0.904            |
| CA_II       | AB_I_m              | 0.087  | -0.303 | 0.452   | 0.436  | 25 | 27 | 0.667 | 0.815            |
| CA_II       | Mito_Vol%_Mus_Total | -0.228 | -0.559 | 0.167   | -1.170 | 25 | 27 | 0.253 | 0.486            |
| CA_II       | Mito_Vol%_Mus_I     | -0.179 | -0.523 | 0.216   | -0.910 | 25 | 27 | 0.371 | 0.560            |
| CA_II       | Mito_Vol%_Mus_S     | -0.220 | -0.553 | 0.175   | -1.126 | 25 | 27 | 0.271 | 0.494            |
| CA_IV       | Form_I_m            | 0.163  | -0.232 | 0.511   | 0.825  | 25 | 27 | 0.417 | 0.612            |
| CA_IV       | Form_S_m            | -0.016 | -0.394 | 0.366   | -0.081 | 25 | 27 | 0.936 | 0.963            |
| CA_IV       | CriSco_I_m          | -0.131 | -0.487 | 0.262   | -0.662 | 25 | 27 | 0.514 | 0.693            |
| CA_IV       | CriSco_S_m          | -0.269 | -0.589 | 0.123   | -1.398 | 25 | 27 | 0.174 | 0.405            |
| CA_IV       | smD_I_m             | 0.016  | -0.367 | 0.393   | 0.078  | 25 | 27 | 0.939 | 0.963            |
| CA_IV       | smD_S_m             | -0.053 | -0.425 | 0.333   | -0.267 | 25 | 27 | 0.792 | 0.895            |
| CA_IV       | meD_I_m             | -0.072 | -0.440 | 0.316   | -0.363 | 25 | 27 | 0.720 | 0.848            |
| CA_IV       | meD_S_m             | -0.083 | -0.449 | 0.307   | -0.415 | 25 | 27 | 0.682 | 0.825            |
| CA_IV       | Dia_I_m             | 0.008  | -0.373 | 0.387   | 0.042  | 25 | 27 | 0.967 | 0.980            |
| CA_IV       | Dia_S_m             | 0.028  | -0.356 | 0.404   | 0.141  | 25 | 27 | 0.889 | 0.940            |
| CA_IV       | AreaMito_I_m        | -0.052 | -0.424 | 0.335   | -0.261 | 25 | 27 | 0.796 | 0.895            |

| Parameter 1 | Parameter 2         | r      | CI_low | CI_high | t      | df | N  | p     | $p_{\text{fdr}}$ |
|-------------|---------------------|--------|--------|---------|--------|----|----|-------|------------------|
| CA_IV       | AreaMito_S_m        | -0.137 | -0.491 | 0.257   | -0.691 | 25 | 27 | 0.496 | 0.683            |
| CA_IV       | AreaMitoTotal_I_m   | -0.124 | -0.481 | 0.269   | -0.625 | 25 | 27 | 0.538 | 0.707            |
| CA_IV       | AreaMitoTotal_S_m   | -0.274 | -0.593 | 0.118   | -1.426 | 25 | 27 | 0.166 | 0.397            |
| CA_IV       | Vol_I_m             | -0.189 | -0.531 | 0.206   | -0.962 | 25 | 27 | 0.345 | 0.554            |
| CA_IV       | Vol_S_m             | -0.275 | -0.593 | 0.117   | -1.432 | 25 | 27 | 0.165 | 0.396            |
| CA_IV       | Sar_I_m             | -0.001 | -0.381 | 0.379   | -0.006 | 25 | 27 | 0.995 | 1.000            |
| CA_IV       | IB_I_m              | 0.262  | -0.131 | 0.584   | 1.359  | 25 | 27 | 0.186 | 0.420            |
| CA_IV       | AB_I_m              | -0.105 | -0.466 | 0.286   | -0.528 | 25 | 27 | 0.602 | 0.760            |
| CA_IV       | Mito_Vol%_Mus_Total | -0.280 | -0.596 | 0.112   | -1.456 | 25 | 27 | 0.158 | 0.390            |
| CA_IV       | Mito_Vol%_Mus_I     | -0.186 | -0.529 | 0.209   | -0.947 | 25 | 27 | 0.353 | 0.554            |
| CA_IV       | Mito_Vol%_Mus_S     | -0.275 | -0.593 | 0.117   | -1.432 | 25 | 27 | 0.165 | 0.396            |
| Form_I_m    | Form_S_m            | 0.384  | 0.005  | 0.667   | 2.080  | 25 | 27 | 0.048 | 0.173            |
| Form_I_m    | CriSco_I_m          | 0.260  | -0.133 | 0.582   | 1.346  | 25 | 27 | 0.190 | 0.420            |
| Form_I_m    | CriSco_S_m          | 0.241  | -0.153 | 0.569   | 1.241  | 25 | 27 | 0.226 | 0.464            |
| Form_I_m    | smD_I_m             | 0.228  | -0.166 | 0.560   | 1.172  | 25 | 27 | 0.252 | 0.486            |
| Form_I_m    | smD_S_m             | 0.152  | -0.242 | 0.503   | 0.769  | 25 | 27 | 0.449 | 0.641            |
| Form_I_m    | meD_I_m             | 0.274  | -0.119 | 0.592   | 1.423  | 25 | 27 | 0.167 | 0.397            |
| Form_I_m    | meD_S_m             | 0.240  | -0.154 | 0.568   | 1.237  | 25 | 27 | 0.228 | 0.465            |
| Form_I_m    | Dia_I_m             | 0.236  | -0.158 | 0.565   | 1.215  | 25 | 27 | 0.236 | 0.473            |
| Form_I_m    | Dia_S_m             | 0.218  | -0.177 | 0.552   | 1.116  | 25 | 27 | 0.275 | 0.494            |
| Form_I_m    | AreaMito_I_m        | 0.169  | -0.226 | 0.516   | 0.857  | 25 | 27 | 0.400 | 0.596            |
| Form_I_m    | AreaMito_S_m        | 0.209  | -0.186 | 0.545   | 1.066  | 25 | 27 | 0.297 | 0.515            |
| Form_I_m    | AreaMitoTotal_I_m   | 0.221  | -0.174 | 0.554   | 1.132  | 25 | 27 | 0.268 | 0.494            |
| Form_I_m    | AreaMitoTotal_S_m   | -0.040 | -0.414 | 0.345   | -0.201 | 25 | 27 | 0.842 | 0.915            |
| Form_I_m    | Vol_I_m             | 0.490  | 0.135  | 0.734   | 2.812  | 25 | 27 | 0.009 | 0.041            |
| Form_I_m    | Vol_S_m             | -0.049 | -0.421 | 0.337   | -0.247 | 25 | 27 | 0.807 | 0.895            |
| Form_I_m    | Sar_I_m             | 0.203  | -0.192 | 0.541   | 1.037  | 25 | 27 | 0.310 | 0.518            |
| Form_I_m    | IB_I_m              | -0.067 | -0.436 | 0.321   | -0.336 | 25 | 27 | 0.740 | 0.858            |
| Form_I_m    | AB_I_m              | 0.216  | -0.178 | 0.551   | 1.107  | 25 | 27 | 0.279 | 0.494            |
| Form_I_m    | Mito_Vol%_Mus_Total | 0.079  | -0.311 | 0.445   | 0.395  | 25 | 27 | 0.696 | 0.832            |
| Form_I_m    | Mito_Vol%_Mus_I     | 0.492  | 0.138  | 0.735   | 2.825  | 25 | 27 | 0.009 | 0.040            |
| Form_I_m    | Mito_Vol%_Mus_S     | -0.049 | -0.421 | 0.337   | -0.247 | 25 | 27 | 0.807 | 0.895            |
| Form_S_m    | CriSco_I_m          | 0.347  | -0.038 | 0.643   | 1.852  | 25 | 27 | 0.076 | 0.246            |
| Form_S_m    | CriSco_S_m          | 0.507  | 0.158  | 0.744   | 2.945  | 25 | 27 | 0.007 | 0.032            |
| Form_S_m    | smD_I_m             | -0.087 | -0.452 | 0.303   | -0.438 | 25 | 27 | 0.665 | 0.815            |
| Form_S_m    | smD_S_m             | 0.088  | -0.302 | 0.453   | 0.442  | 25 | 27 | 0.662 | 0.815            |
| Form_S_m    | meD_I_m             | -0.039 | -0.413 | 0.346   | -0.196 | 25 | 27 | 0.846 | 0.916            |
| Form_S_m    | meD_S_m             | 0.262  | -0.131 | 0.584   | 1.360  | 25 | 27 | 0.186 | 0.420            |

| Parameter 1 | Parameter 2         | r      | CI_low | CI_high | t      | df | N  | p     | $p_{\text{fdr}}$ |
|-------------|---------------------|--------|--------|---------|--------|----|----|-------|------------------|
| Form_S_m    | Dia_I_m             | -0.162 | -0.510 | 0.232   | -0.820 | 25 | 27 | 0.420 | 0.612            |
| Form_S_m    | Dia_S_m             | 0.133  | -0.260 | 0.488   | 0.670  | 25 | 27 | 0.509 | 0.690            |
| Form_S_m    | AreaMito_I_m        | -0.140 | -0.493 | 0.254   | -0.705 | 25 | 27 | 0.487 | 0.681            |
| Form_S_m    | AreaMito_S_m        | 0.203  | -0.191 | 0.542   | 1.039  | 25 | 27 | 0.309 | 0.518            |
| Form_S_m    | AreaMitoTotal_I_m   | 0.316  | -0.072 | 0.622   | 1.667  | 25 | 27 | 0.108 | 0.316            |
| Form_S_m    | AreaMitoTotal_S_m   | 0.218  | -0.176 | 0.552   | 1.118  | 25 | 27 | 0.274 | 0.494            |
| Form_S_m    | Vol_I_m             | 0.121  | -0.271 | 0.479   | 0.611  | 25 | 27 | 0.547 | 0.716            |
| Form_S_m    | Vol_S_m             | 0.216  | -0.178 | 0.551   | 1.108  | 25 | 27 | 0.278 | 0.494            |
| Form_S_m    | Sar_I_m             | 0.185  | -0.210 | 0.528   | 0.943  | 25 | 27 | 0.355 | 0.554            |
| Form_S_m    | IB_I_m              | -0.023 | -0.399 | 0.360   | -0.115 | 25 | 27 | 0.910 | 0.948            |
| Form_S_m    | AB_I_m              | 0.247  | -0.147 | 0.573   | 1.274  | 25 | 27 | 0.214 | 0.456            |
| Form_S_m    | Mito_Vol%_Mus_Total | 0.133  | -0.260 | 0.488   | 0.670  | 25 | 27 | 0.509 | 0.690            |
| Form_S_m    | Mito_Vol%_Mus_I     | 0.119  | -0.274 | 0.477   | 0.598  | 25 | 27 | 0.555 | 0.717            |
| Form_S_m    | Mito_Vol%_Mus_S     | 0.216  | -0.178 | 0.551   | 1.108  | 25 | 27 | 0.278 | 0.494            |
| CriSco_I_m  | CriSco_S_m          | 0.697  | 0.431  | 0.851   | 4.857  | 25 | 27 | 0.000 | 0.000            |
| CriSco_I_m  | smD_I_m             | 0.073  | -0.316 | 0.441   | 0.367  | 25 | 27 | 0.717 | 0.847            |
| CriSco_I_m  | smD_S_m             | 0.164  | -0.230 | 0.512   | 0.831  | 25 | 27 | 0.414 | 0.610            |
| CriSco_I_m  | meD_I_m             | 0.267  | -0.126 | 0.587   | 1.384  | 25 | 27 | 0.178 | 0.412            |
| CriSco_I_m  | meD_S_m             | 0.277  | -0.115 | 0.594   | 1.440  | 25 | 27 | 0.162 | 0.396            |
| CriSco_I_m  | Dia_I_m             | 0.159  | -0.235 | 0.508   | 0.805  | 25 | 27 | 0.429 | 0.619            |
| CriSco_I_m  | Dia_S_m             | 0.161  | -0.233 | 0.510   | 0.815  | 25 | 27 | 0.423 | 0.613            |
| CriSco_I_m  | AreaMito_I_m        | 0.189  | -0.205 | 0.531   | 0.964  | 25 | 27 | 0.344 | 0.554            |
| CriSco_I_m  | AreaMito_S_m        | 0.244  | -0.150 | 0.571   | 1.256  | 25 | 27 | 0.221 | 0.461            |
| CriSco_I_m  | AreaMitoTotal_I_m   | 0.222  | -0.172 | 0.556   | 1.141  | 25 | 27 | 0.265 | 0.494            |
| CriSco_I_m  | AreaMitoTotal_S_m   | 0.231  | -0.164 | 0.562   | 1.186  | 25 | 27 | 0.247 | 0.486            |
| CriSco_I_m  | Vol_I_m             | 0.348  | -0.037 | 0.643   | 1.856  | 25 | 27 | 0.075 | 0.246            |
| CriSco_I_m  | Vol_S_m             | 0.224  | -0.171 | 0.557   | 1.149  | 25 | 27 | 0.262 | 0.494            |
| CriSco_I_m  | Sar_I_m             | 0.203  | -0.192 | 0.541   | 1.036  | 25 | 27 | 0.310 | 0.518            |
| CriSco_I_m  | IB_I_m              | 0.059  | -0.329 | 0.429   | 0.295  | 25 | 27 | 0.771 | 0.884            |
| CriSco_I_m  | AB_I_m              | 0.261  | -0.132 | 0.583   | 1.352  | 25 | 27 | 0.188 | 0.420            |
| CriSco_I_m  | Mito_Vol%_Mus_Total | 0.228  | -0.166 | 0.560   | 1.172  | 25 | 27 | 0.252 | 0.486            |
| CriSco_I_m  | Mito_Vol%_Mus_I     | 0.342  | -0.044 | 0.639   | 1.817  | 25 | 27 | 0.081 | 0.248            |
| CriSco_I_m  | Mito_Vol%_Mus_S     | 0.224  | -0.171 | 0.557   | 1.149  | 25 | 27 | 0.262 | 0.494            |
| CriSco_S_m  | smD_I_m             | -0.137 | -0.491 | 0.256   | -0.691 | 25 | 27 | 0.496 | 0.683            |
| CriSco_S_m  | smD_S_m             | 0.168  | -0.226 | 0.516   | 0.855  | 25 | 27 | 0.401 | 0.596            |
| CriSco_S_m  | meD_I_m             | 0.027  | -0.356 | 0.403   | 0.137  | 25 | 27 | 0.892 | 0.941            |
| CriSco_S_m  | meD_S_m             | 0.320  | -0.068 | 0.624   | 1.688  | 25 | 27 | 0.104 | 0.306            |
| CriSco_S_m  | Dia_I_m             | -0.077 | -0.444 | 0.313   | -0.384 | 25 | 27 | 0.704 | 0.835            |

| Parameter 1 | Parameter 2         | r      | CI_low | CI_high | t      | df | N  | p     | $p_{\text{fdr}}$ |
|-------------|---------------------|--------|--------|---------|--------|----|----|-------|------------------|
| CriSco_S_m  | Dia_S_m             | 0.238  | -0.156 | 0.567   | 1.224  | 25 | 27 | 0.233 | 0.472            |
| CriSco_S_m  | AreaMito_I_m        | -0.072 | -0.440 | 0.317   | -0.359 | 25 | 27 | 0.722 | 0.848            |
| CriSco_S_m  | AreaMito_S_m        | 0.282  | -0.110 | 0.598   | 1.468  | 25 | 27 | 0.154 | 0.385            |
| CriSco_S_m  | AreaMitoTotal_I_m   | 0.206  | -0.189 | 0.543   | 1.050  | 25 | 27 | 0.304 | 0.518            |
| CriSco_S_m  | AreaMitoTotal_S_m   | 0.473  | 0.113  | 0.723   | 2.681  | 25 | 27 | 0.013 | 0.055            |
| CriSco_S_m  | Vol_I_m             | 0.146  | -0.248 | 0.498   | 0.738  | 25 | 27 | 0.468 | 0.662            |
| CriSco_S_m  | Vol_S_m             | 0.471  | 0.111  | 0.722   | 2.673  | 25 | 27 | 0.013 | 0.055            |
| CriSco_S_m  | Sar_I_m             | 0.295  | -0.096 | 0.607   | 1.542  | 25 | 27 | 0.136 | 0.363            |
| CriSco_S_m  | IB_I_m              | -0.031 | -0.406 | 0.353   | -0.154 | 25 | 27 | 0.879 | 0.940            |
| CriSco_S_m  | AB_I_m              | 0.408  | 0.034  | 0.682   | 2.237  | 25 | 27 | 0.034 | 0.130            |
| CriSco_S_m  | Mito_Vol%_Mus_Total | 0.405  | 0.029  | 0.680   | 2.212  | 25 | 27 | 0.036 | 0.134            |
| CriSco_S_m  | Mito_Vol%_Mus_I     | 0.138  | -0.255 | 0.492   | 0.698  | 25 | 27 | 0.492 | 0.682            |
| CriSco_S_m  | Mito_Vol%_Mus_S     | 0.471  | 0.111  | 0.722   | 2.673  | 25 | 27 | 0.013 | 0.055            |
| smD_I_m     | smD_S_m             | 0.804  | 0.610  | 0.907   | 6.760  | 25 | 27 | 0.000 | 0.000            |
| smD_I_m     | meD_I_m             | 0.906  | 0.803  | 0.957   | 10.730 | 25 | 27 | 0.000 | 0.000            |
| smD_I_m     | meD_S_m             | 0.655  | 0.365  | 0.829   | 4.329  | 25 | 27 | 0.000 | 0.001            |
| smD_I_m     | Dia_I_m             | 0.865  | 0.723  | 0.937   | 8.628  | 25 | 27 | 0.000 | 0.000            |
| smD_I_m     | Dia_S_m             | 0.566  | 0.237  | 0.779   | 3.434  | 25 | 27 | 0.002 | 0.011            |
| smD_I_m     | AreaMito_I_m        | 0.901  | 0.792  | 0.954   | 10.380 | 25 | 27 | 0.000 | 0.000            |
| smD_I_m     | AreaMito_S_m        | 0.724  | 0.474  | 0.866   | 5.243  | 25 | 27 | 0.000 | 0.000            |
| smD_I_m     | AreaMitoTotal_I_m   | 0.287  | -0.104 | 0.602   | 1.501  | 25 | 27 | 0.146 | 0.367            |
| smD_I_m     | AreaMitoTotal_S_m   | 0.298  | -0.093 | 0.609   | 1.560  | 25 | 27 | 0.131 | 0.360            |
| smD_I_m     | Vol_I_m             | 0.615  | 0.307  | 0.807   | 3.901  | 25 | 27 | 0.001 | 0.004            |
| smD_I_m     | Vol_S_m             | 0.294  | -0.097 | 0.606   | 1.538  | 25 | 27 | 0.137 | 0.363            |
| smD_I_m     | Sar_I_m             | 0.167  | -0.227 | 0.515   | 0.849  | 25 | 27 | 0.404 | 0.598            |
| smD_I_m     | IB_I_m              | 0.183  | -0.212 | 0.526   | 0.930  | 25 | 27 | 0.361 | 0.558            |
| smD_I_m     | AB_I_m              | 0.145  | -0.249 | 0.497   | 0.732  | 25 | 27 | 0.471 | 0.664            |
| smD_I_m     | Mito_Vol%_Mus_Total | 0.440  | 0.072  | 0.703   | 2.449  | 25 | 27 | 0.022 | 0.086            |
| smD_I_m     | Mito_Vol%_Mus_I     | 0.617  | 0.310  | 0.808   | 3.922  | 25 | 27 | 0.001 | 0.003            |
| smD_I_m     | Mito_Vol%_Mus_S     | 0.294  | -0.097 | 0.606   | 1.538  | 25 | 27 | 0.137 | 0.363            |
| smD_S_m     | meD_I_m             | 0.784  | 0.575  | 0.897   | 6.311  | 25 | 27 | 0.000 | 0.000            |
| smD_S_m     | meD_S_m             | 0.897  | 0.785  | 0.953   | 10.173 | 25 | 27 | 0.000 | 0.000            |
| smD_S_m     | Dia_I_m             | 0.716  | 0.462  | 0.862   | 5.128  | 25 | 27 | 0.000 | 0.000            |
| smD_S_m     | Dia_S_m             | 0.836  | 0.669  | 0.923   | 7.627  | 25 | 27 | 0.000 | 0.000            |
| smD_S_m     | AreaMito_I_m        | 0.673  | 0.393  | 0.838   | 4.544  | 25 | 27 | 0.000 | 0.001            |
| smD_S_m     | AreaMito_S_m        | 0.956  | 0.905  | 0.980   | 16.293 | 25 | 27 | 0.000 | 0.000            |
| smD_S_m     | AreaMitoTotal_I_m   | 0.257  | -0.136 | 0.580   | 1.331  | 25 | 27 | 0.195 | 0.426            |

| Parameter 1 | Parameter 2         | r     | CI_low | CI_high | t      | df | N  | p     | $p_{\text{fdr}}$ |
|-------------|---------------------|-------|--------|---------|--------|----|----|-------|------------------|
| smD_S_m     | AreaMitoTotal_S_m   | 0.682 | 0.408  | 0.844   | 4.669  | 25 | 27 | 0.000 | 0.001            |
| smD_S_m     | Vol_I_m             | 0.508 | 0.158  | 0.744   | 2.947  | 25 | 27 | 0.007 | 0.032            |
| smD_S_m     | Vol_S_m             | 0.676 | 0.398  | 0.840   | 4.584  | 25 | 27 | 0.000 | 0.001            |
| smD_S_m     | Sar_I_m             | 0.134 | -0.259 | 0.489   | 0.677  | 25 | 27 | 0.505 | 0.690            |
| smD_S_m     | IB_I_m              | 0.154 | -0.240 | 0.505   | 0.781  | 25 | 27 | 0.442 | 0.633            |
| smD_S_m     | AB_I_m              | 0.189 | -0.205 | 0.531   | 0.965  | 25 | 27 | 0.344 | 0.554            |
| smD_S_m     | Mito_Vol%_Mus_Total | 0.711 | 0.453  | 0.859   | 5.051  | 25 | 27 | 0.000 | 0.000            |
| smD_S_m     | Mito_Vol%_Mus_I     | 0.504 | 0.153  | 0.742   | 2.916  | 25 | 27 | 0.007 | 0.034            |
| smD_S_m     | Mito_Vol%_Mus_S     | 0.676 | 0.398  | 0.840   | 4.584  | 25 | 27 | 0.000 | 0.001            |
| meD_I_m     | meD_S_m             | 0.695 | 0.429  | 0.851   | 4.838  | 25 | 27 | 0.000 | 0.000            |
| meD_I_m     | Dia_I_m             | 0.918 | 0.826  | 0.962   | 11.569 | 25 | 27 | 0.000 | 0.000            |
| meD_I_m     | Dia_S_m             | 0.587 | 0.266  | 0.791   | 3.624  | 25 | 27 | 0.001 | 0.007            |
| meD_I_m     | AreaMito_I_m        | 0.941 | 0.873  | 0.973   | 13.896 | 25 | 27 | 0.000 | 0.000            |
| meD_I_m     | AreaMito_S_m        | 0.768 | 0.548  | 0.889   | 5.992  | 25 | 27 | 0.000 | 0.000            |
| meD_I_m     | AreaMitoTotal_I_m   | 0.311 | -0.078 | 0.618   | 1.637  | 25 | 27 | 0.114 | 0.321            |
| meD_I_m     | AreaMitoTotal_S_m   | 0.377 | -0.003 | 0.662   | 2.036  | 25 | 27 | 0.052 | 0.184            |
| meD_I_m     | Vol_I_m             | 0.656 | 0.368  | 0.830   | 4.351  | 25 | 27 | 0.000 | 0.001            |
| meD_I_m     | Vol_S_m             | 0.368 | -0.014 | 0.656   | 1.976  | 25 | 27 | 0.059 | 0.204            |
| meD_I_m     | Sar_I_m             | 0.327 | -0.061 | 0.629   | 1.729  | 25 | 27 | 0.096 | 0.288            |
| meD_I_m     | IB_I_m              | 0.226 | -0.169 | 0.558   | 1.158  | 25 | 27 | 0.258 | 0.492            |
| meD_I_m     | AB_I_m              | 0.360 | -0.023 | 0.651   | 1.929  | 25 | 27 | 0.065 | 0.222            |
| meD_I_m     | Mito_Vol%_Mus_Total | 0.496 | 0.143  | 0.737   | 2.858  | 25 | 27 | 0.008 | 0.038            |
| meD_I_m     | Mito_Vol%_Mus_I     | 0.653 | 0.363  | 0.828   | 4.312  | 25 | 27 | 0.000 | 0.001            |
| meD_I_m     | Mito_Vol%_Mus_S     | 0.368 | -0.014 | 0.656   | 1.976  | 25 | 27 | 0.059 | 0.204            |
| meD_S_m     | Dia_I_m             | 0.630 | 0.328  | 0.815   | 4.052  | 25 | 27 | 0.000 | 0.003            |
| meD_S_m     | Dia_S_m             | 0.929 | 0.849  | 0.968   | 12.583 | 25 | 27 | 0.000 | 0.000            |
| meD_S_m     | AreaMito_I_m        | 0.559 | 0.227  | 0.775   | 3.372  | 25 | 27 | 0.002 | 0.012            |
| meD_S_m     | AreaMito_S_m        | 0.938 | 0.867  | 0.972   | 13.546 | 25 | 27 | 0.000 | 0.000            |
| meD_S_m     | AreaMitoTotal_I_m   | 0.203 | -0.191 | 0.542   | 1.038  | 25 | 27 | 0.309 | 0.518            |
| meD_S_m     | AreaMitoTotal_S_m   | 0.694 | 0.427  | 0.850   | 4.823  | 25 | 27 | 0.000 | 0.000            |
| meD_S_m     | Vol_I_m             | 0.450 | 0.085  | 0.709   | 2.522  | 25 | 27 | 0.018 | 0.075            |
| meD_S_m     | Vol_S_m             | 0.687 | 0.416  | 0.846   | 4.729  | 25 | 27 | 0.000 | 0.001            |
| meD_S_m     | Sar_I_m             | 0.293 | -0.098 | 0.605   | 1.530  | 25 | 27 | 0.139 | 0.363            |
| meD_S_m     | IB_I_m              | 0.100 | -0.292 | 0.462   | 0.500  | 25 | 27 | 0.621 | 0.779            |
| meD_S_m     | AB_I_m              | 0.359 | -0.024 | 0.650   | 1.924  | 25 | 27 | 0.066 | 0.222            |
| meD_S_m     | Mito_Vol%_Mus_Total | 0.655 | 0.366  | 0.829   | 4.335  | 25 | 27 | 0.000 | 0.001            |

| Parameter 1  | Parameter 2         | r     | CI_low | CI_high | t     | df | N  | p     | $p_{\text{fdr}}$ |
|--------------|---------------------|-------|--------|---------|-------|----|----|-------|------------------|
| meD_S_m      | Mito_Vol%_Mus_I     | 0.449 | 0.083  | 0.708   | 2.513 | 25 | 27 | 0.019 | 0.076            |
| meD_S_m      | Mito_Vol%_Mus_S     | 0.687 | 0.416  | 0.846   | 4.729 | 25 | 27 | 0.000 | 0.001            |
| Dia_I_m      | Dia_S_m             | 0.656 | 0.368  | 0.830   | 4.351 | 25 | 27 | 0.000 | 0.001            |
| Dia_I_m      | AreaMito_I_m        | 0.875 | 0.742  | 0.942   | 9.050 | 25 | 27 | 0.000 | 0.000            |
| Dia_I_m      | AreaMito_S_m        | 0.654 | 0.365  | 0.828   | 4.328 | 25 | 27 | 0.000 | 0.001            |
| Dia_I_m      | AreaMitoTotal_I_m   | 0.344 | -0.041 | 0.641   | 1.834 | 25 | 27 | 0.079 | 0.246            |
| Dia_I_m      | AreaMitoTotal_S_m   | 0.271 | -0.121 | 0.591   | 1.410 | 25 | 27 | 0.171 | 0.403            |
| Dia_I_m      | Vol_I_m             | 0.637 | 0.338  | 0.819   | 4.127 | 25 | 27 | 0.000 | 0.002            |
| Dia_I_m      | Vol_S_m             | 0.262 | -0.131 | 0.584   | 1.358 | 25 | 27 | 0.187 | 0.420            |
| Dia_I_m      | Sar_I_m             | 0.248 | -0.146 | 0.574   | 1.279 | 25 | 27 | 0.213 | 0.455            |
| Dia_I_m      | IB_I_m              | 0.124 | -0.268 | 0.482   | 0.627 | 25 | 27 | 0.537 | 0.707            |
| Dia_I_m      | AB_I_m              | 0.277 | -0.116 | 0.594   | 1.439 | 25 | 27 | 0.163 | 0.396            |
| Dia_I_m      | Mito_Vol%_Mus_Total | 0.421 | 0.049  | 0.691   | 2.322 | 25 | 27 | 0.029 | 0.111            |
| Dia_I_m      | Mito_Vol%_Mus_I     | 0.634 | 0.335  | 0.817   | 4.102 | 25 | 27 | 0.000 | 0.002            |
| Dia_I_m      | Mito_Vol%_Mus_S     | 0.262 | -0.131 | 0.584   | 1.358 | 25 | 27 | 0.187 | 0.420            |
| Dia_S_m      | AreaMito_I_m        | 0.450 | 0.085  | 0.709   | 2.520 | 25 | 27 | 0.018 | 0.075            |
| Dia_S_m      | AreaMito_S_m        | 0.844 | 0.683  | 0.927   | 7.874 | 25 | 27 | 0.000 | 0.000            |
| Dia_S_m      | AreaMitoTotal_I_m   | 0.199 | -0.196 | 0.539   | 1.017 | 25 | 27 | 0.319 | 0.531            |
| Dia_S_m      | AreaMitoTotal_S_m   | 0.609 | 0.298  | 0.803   | 3.842 | 25 | 27 | 0.001 | 0.004            |
| Dia_S_m      | Vol_I_m             | 0.409 | 0.034  | 0.683   | 2.242 | 25 | 27 | 0.034 | 0.130            |
| Dia_S_m      | Vol_S_m             | 0.602 | 0.288  | 0.799   | 3.773 | 25 | 27 | 0.001 | 0.005            |
| Dia_S_m      | Sar_I_m             | 0.213 | -0.182 | 0.549   | 1.090 | 25 | 27 | 0.286 | 0.502            |
| Dia_S_m      | IB_I_m              | 0.046 | -0.340 | 0.419   | 0.233 | 25 | 27 | 0.818 | 0.903            |
| Dia_S_m      | AB_I_m              | 0.287 | -0.104 | 0.601   | 1.498 | 25 | 27 | 0.147 | 0.367            |
| Dia_S_m      | Mito_Vol%_Mus_Total | 0.590 | 0.271  | 0.793   | 3.656 | 25 | 27 | 0.001 | 0.006            |
| Dia_S_m      | Mito_Vol%_Mus_I     | 0.407 | 0.032  | 0.682   | 2.228 | 25 | 27 | 0.035 | 0.131            |
| Dia_S_m      | Mito_Vol%_Mus_S     | 0.602 | 0.288  | 0.799   | 3.773 | 25 | 27 | 0.001 | 0.005            |
| AreaMito_I_m | AreaMito_S_m        | 0.640 | 0.343  | 0.820   | 4.164 | 25 | 27 | 0.000 | 0.002            |
| AreaMito_I_m | AreaMitoTotal_I_m   | 0.179 | -0.216 | 0.524   | 0.911 | 25 | 27 | 0.371 | 0.560            |
| AreaMito_I_m | AreaMitoTotal_S_m   | 0.291 | -0.100 | 0.604   | 1.523 | 25 | 27 | 0.140 | 0.365            |
| AreaMito_I_m | Vol_I_m             | 0.626 | 0.323  | 0.813   | 4.017 | 25 | 27 | 0.000 | 0.003            |
| AreaMito_I_m | Vol_S_m             | 0.287 | -0.104 | 0.601   | 1.499 | 25 | 27 | 0.147 | 0.367            |
| AreaMito_I_m | Sar_I_m             | 0.258 | -0.136 | 0.581   | 1.334 | 25 | 27 | 0.194 | 0.426            |
| AreaMito_I_m | IB_I_m              | 0.210 | -0.185 | 0.546   | 1.072 | 25 | 27 | 0.294 | 0.514            |
| AreaMito_I_m | AB_I_m              | 0.260 | -0.133 | 0.583   | 1.348 | 25 | 27 | 0.190 | 0.420            |



| Parameter 1       | Parameter 2         | r      | CI_low | CI_high | t           | df | N  | p     | $p_{\text{fdr}}$ |
|-------------------|---------------------|--------|--------|---------|-------------|----|----|-------|------------------|
| AreaMito_I_m      | Mito_Vol%_Mus_Total | 0.425  | 0.054  | 0.693   | 2.349       | 25 | 27 | 0.027 | 0.105            |
| AreaMito_I_m      | Mito_Vol%_Mus_I     | 0.624  | 0.319  | 0.811   | 3.988       | 25 | 27 | 0.001 | 0.003            |
| AreaMito_I_m      | Mito_Vol%_Mus_S     | 0.287  | -0.104 | 0.601   | 1.499       | 25 | 27 | 0.147 | 0.367            |
| AreaMito_S_m      | AreaMitoTotal_I_m   | 0.245  | -0.148 | 0.572   | 1.266       | 25 | 27 | 0.217 | 0.459            |
| AreaMito_S_m      | AreaMitoTotal_S_m   | 0.733  | 0.489  | 0.871   | 5.388       | 25 | 27 | 0.000 | 0.000            |
| AreaMito_S_m      | Vol_I_m             | 0.509  | 0.160  | 0.745   | 2.954       | 25 | 27 | 0.007 | 0.032            |
| AreaMito_S_m      | Vol_S_m             | 0.724  | 0.474  | 0.866   | 5.240       | 25 | 27 | 0.000 | 0.000            |
| AreaMito_S_m      | Sar_I_m             | 0.215  | -0.179 | 0.550   | 1.103       | 25 | 27 | 0.281 | 0.495            |
| AreaMito_S_m      | IB_I_m              | 0.204  | -0.191 | 0.542   | 1.042       | 25 | 27 | 0.307 | 0.518            |
| AreaMito_S_m      | AB_I_m              | 0.297  | -0.094 | 0.608   | 1.555       | 25 | 27 | 0.133 | 0.361            |
| AreaMito_S_m      | Mito_Vol%_Mus_Total | 0.731  | 0.487  | 0.870   | 5.362       | 25 | 27 | 0.000 | 0.000            |
| AreaMito_S_m      | Mito_Vol%_Mus_I     | 0.502  | 0.151  | 0.741   | 2.904       | 25 | 27 | 0.008 | 0.034            |
| AreaMito_S_m      | Mito_Vol%_Mus_S     | 0.724  | 0.474  | 0.866   | 5.240       | 25 | 27 | 0.000 | 0.000            |
| AreaMitoTotal_I_m | AreaMitoTotal_S_m   | 0.044  | -0.342 | 0.417   | 0.221       | 25 | 27 | 0.827 | 0.904            |
| AreaMitoTotal_I_m | Vol_I_m             | 0.381  | 0.001  | 0.665   | 2.062       | 25 | 27 | 0.050 | 0.178            |
| AreaMitoTotal_I_m | Vol_S_m             | 0.038  | -0.347 | 0.412   | 0.189       | 25 | 27 | 0.852 | 0.917            |
| AreaMitoTotal_I_m | Sar_I_m             | 0.118  | -0.274 | 0.477   | 0.597       | 25 | 27 | 0.556 | 0.717            |
| AreaMitoTotal_I_m | IB_I_m              | -0.064 | -0.433 | 0.324   | -0.321      | 25 | 27 | 0.751 | 0.867            |
| AreaMitoTotal_I_m | AB_I_m              | 0.195  | -0.200 | 0.535   | 0.993       | 25 | 27 | 0.330 | 0.542            |
| AreaMitoTotal_I_m | Mito_Vol%_Mus_Total | 0.207  | -0.188 | 0.544   | 1.056       | 25 | 27 | 0.301 | 0.518            |
| AreaMitoTotal_I_m | Mito_Vol%_Mus_I     | 0.378  | -0.003 | 0.663   | 2.040       | 25 | 27 | 0.052 | 0.184            |
| AreaMitoTotal_I_m | Mito_Vol%_Mus_S     | 0.038  | -0.347 | 0.412   | 0.189       | 25 | 27 | 0.852 | 0.917            |
| AreaMitoTotal_S_m | Vol_I_m             | 0.320  | -0.068 | 0.624   | 1.690       | 25 | 27 | 0.104 | 0.306            |
| AreaMitoTotal_S_m | Vol_S_m             | 0.999  | 0.998  | 1.000   | 129.69<br>2 | 25 | 27 | 0.000 | 0.000            |
| AreaMitoTotal_S_m | Sar_I_m             | 0.139  | -0.255 | 0.493   | 0.701       | 25 | 27 | 0.490 | 0.682            |
| AreaMitoTotal_S_m | IB_I_m              | 0.062  | -0.325 | 0.432   | 0.313       | 25 | 27 | 0.757 | 0.871            |
| AreaMitoTotal_S_m | AB_I_m              | 0.234  | -0.160 | 0.564   | 1.203       | 25 | 27 | 0.240 | 0.480            |
| AreaMitoTotal_S_m | Mito_Vol%_Mus_Total | 0.938  | 0.868  | 0.972   | 13.560      | 25 | 27 | 0.000 | 0.000            |

| Parameter 1               | Parameter 2             | r      | CI_low | CI_high | t           | df | N  | p     | $p_{\text{fdr}}$ |
|---------------------------|-------------------------|--------|--------|---------|-------------|----|----|-------|------------------|
| AreaMitoTotal_<br>S_m     | Mito_Vol%_Mus_<br>I     | 0.312  | -0.077 | 0.619   | 1.644       | 25 | 27 | 0.113 | 0.321            |
| AreaMitoTotal_<br>S_m     | Mito_Vol%_Mus_<br>S     | 0.999  | 0.998  | 1.000   | 129.69<br>2 | 25 | 27 | 0.000 | 0.000            |
| Vol_I_m                   | Vol_S_m                 | 0.314  | -0.075 | 0.620   | 1.652       | 25 | 27 | 0.111 | 0.320            |
| Vol_I_m                   | Sar_I_m                 | 0.190  | -0.204 | 0.532   | 0.970       | 25 | 27 | 0.341 | 0.554            |
| Vol_I_m                   | IB_I_m                  | 0.081  | -0.308 | 0.448   | 0.409       | 25 | 27 | 0.686 | 0.828            |
| Vol_I_m                   | AB_I_m                  | 0.180  | -0.214 | 0.524   | 0.916       | 25 | 27 | 0.368 | 0.560            |
| Vol_I_m                   | Mito_Vol%_Mus_<br>Total | 0.550  | 0.215  | 0.769   | 3.295       | 25 | 27 | 0.003 | 0.014            |
| Vol_I_m                   | Mito_Vol%_Mus_<br>I     | 1.000  | 0.999  | 1.000   | 192.99<br>6 | 25 | 27 | 0.000 | 0.000            |
| Vol_I_m                   | Mito_Vol%_Mus_<br>S     | 0.314  | -0.075 | 0.620   | 1.652       | 25 | 27 | 0.111 | 0.320            |
| Vol_S_m                   | Sar_I_m                 | 0.127  | -0.266 | 0.483   | 0.638       | 25 | 27 | 0.530 | 0.704            |
| Vol_S_m                   | IB_I_m                  | 0.050  | -0.336 | 0.422   | 0.252       | 25 | 27 | 0.803 | 0.895            |
| Vol_S_m                   | AB_I_m                  | 0.222  | -0.173 | 0.555   | 1.137       | 25 | 27 | 0.266 | 0.494            |
| Vol_S_m                   | Mito_Vol%_Mus_<br>Total | 0.937  | 0.865  | 0.971   | 13.441      | 25 | 27 | 0.000 | 0.000            |
| Vol_S_m                   | Mito_Vol%_Mus_<br>I     | 0.306  | -0.084 | 0.614   | 1.606       | 25 | 27 | 0.121 | 0.334            |
| Vol_S_m                   | Mito_Vol%_Mus_<br>S     | 1.000  | 1.000  | 1.000   | Inf         | 25 | 27 | 0.000 | 0.000            |
| Sar_I_m                   | IB_I_m                  | 0.557  | 0.224  | 0.773   | 3.353       | 25 | 27 | 0.003 | 0.013            |
| Sar_I_m                   | AB_I_m                  | 0.956  | 0.905  | 0.980   | 16.342      | 25 | 27 | 0.000 | 0.000            |
| Sar_I_m                   | Mito_Vol%_Mus_<br>Total | 0.091  | -0.299 | 0.455   | 0.456       | 25 | 27 | 0.652 | 0.806            |
| Sar_I_m                   | Mito_Vol%_Mus_<br>I     | 0.195  | -0.200 | 0.535   | 0.995       | 25 | 27 | 0.329 | 0.542            |
| Sar_I_m                   | Mito_Vol%_Mus_<br>S     | 0.127  | -0.266 | 0.483   | 0.638       | 25 | 27 | 0.530 | 0.704            |
| IB_I_m                    | AB_I_m                  | 0.438  | 0.070  | 0.701   | 2.437       | 25 | 27 | 0.022 | 0.088            |
| IB_I_m                    | Mito_Vol%_Mus_<br>Total | -0.016 | -0.393 | 0.367   | -0.078      | 25 | 27 | 0.938 | 0.963            |
| IB_I_m                    | Mito_Vol%_Mus_<br>I     | 0.078  | -0.311 | 0.445   | 0.394       | 25 | 27 | 0.697 | 0.832            |
| IB_I_m                    | Mito_Vol%_Mus_<br>S     | 0.050  | -0.336 | 0.422   | 0.252       | 25 | 27 | 0.803 | 0.895            |
| AB_I_m                    | Mito_Vol%_Mus_<br>Total | 0.185  | -0.210 | 0.528   | 0.939       | 25 | 27 | 0.357 | 0.554            |
| AB_I_m                    | Mito_Vol%_Mus_<br>I     | 0.180  | -0.215 | 0.524   | 0.915       | 25 | 27 | 0.369 | 0.560            |
| AB_I_m                    | Mito_Vol%_Mus_<br>S     | 0.222  | -0.173 | 0.555   | 1.137       | 25 | 27 | 0.266 | 0.494            |
| Mito_Vol%_Mus_<br>s_Total | Mito_Vol%_Mus_<br>I     | 0.543  | 0.205  | 0.765   | 3.233       | 25 | 27 | 0.003 | 0.016            |
| Mito_Vol%_Mus_<br>s_Total | Mito_Vol%_Mus_<br>S     | 0.937  | 0.865  | 0.971   | 13.441      | 25 | 27 | 0.000 | 0.000            |
| Mito_Vol%_Mus_<br>s_I     | Mito_Vol%_Mus_<br>S     | 0.306  | -0.084 | 0.614   | 1.606       | 25 | 27 | 0.121 | 0.334            |

## Supplementary Table S2

*Group differences (bootstrapped results).*

|                                                       | <b>M (SD)<sub>CFS</sub></b> | <b>M (SD)<sub>PCS</sub></b> | <b>T<sub>Diff</sub></b> | <b>T<sub>y</sub></b> | <b>p<sub>y</sub></b> | <b>δ<sub>t</sub></b> | <b>95%-CI<sub>δt</sub></b> |
|-------------------------------------------------------|-----------------------------|-----------------------------|-------------------------|----------------------|----------------------|----------------------|----------------------------|
| Shape <sub>intermyofibrillar</sub>                    | 1.40 (0.30)                 | 1.42 (0.27)                 | -0.02                   | -0.12                | 0.887                | -0.05                | [-0.74, 0.95]              |
| Shape <sub>subsarcolemmal</sub>                       | 1.50 (0.24)                 | 1.65 (0.31)                 | -0.16                   | -1.05                | 0.237                | -0.44                | [-1.2, 0.34]               |
| Cristae-Score <sub>intermyofibrillar</sub>            | 1.56 (0.69)                 | 2.70 (0.96)                 | -1.33                   | -3.61                | <b>0.001</b>         | -1.52                | [-2.89, -0.55]             |
| Cristae-Score <sub>subsarcolemmal</sub>               | 1.69 (0.82)                 | 2.97 (0.82)                 | -1.39                   | -4.08                | <b>0.001</b>         | -1.67                | [-3.02, -0.77]             |
| minimal Feret's Diameter <sub>intermyofibrillar</sub> | 0.23 (0.04)                 | 0.25 (0.05)                 | -0.01                   | -0.37                | 0.682                | -0.15                | [-0.84, 0.71]              |
| minimal Feret's Diameter <sub>subsarcolemmal</sub>    | 0.25 (0.04)                 | 0.27 (0.05)                 | -0.03                   | -1.24                | 0.166                | -0.51                | [-1.29, 0.22]              |
| Feret's Diameter <sub>intermyofibrillar</sub>         | 0.41 (0.09)                 | 0.45 (0.09)                 | -0.02                   | -0.55                | 0.533                | -0.22                | [-0.98, 0.48]              |
| Feret's Diameter <sub>subsarcolemmal</sub>            | 0.43 (0.07)                 | 0.50 (0.08)                 | -0.07                   | -2.02                | <b>0.037</b>         | -0.83                | [-1.97, -0.17]             |
| Perimeter <sub>intermyofibrillar</sub>                | 1.03 (0.19)                 | 1.15 (0.24)                 | -0.09                   | -0.93                | 0.291                | -0.38                | [-1.19, 0.5]               |
| Perimeter <sub>subsarcolemmal</sub>                   | 1.11 (0.17)                 | 1.27 (0.20)                 | -0.21                   | -2.54                | <b>0.018</b>         | -1.06                | [-2.53, -0.18]             |
| Mean Area <sub>intermyofibrillar</sub>                | 0.09 (0.04)                 | 0.09 (0.04)                 | -0.01                   | -0.45                | 0.605                | -0.18                | [-0.9, 0.4]                |
| Mean Area <sub>subsarcolemmal</sub>                   | 0.090<br>(0.031)            | 0.107<br>(0.031)            | -0.02                   | -1.49                | 0.106                | -0.61                | [-1.83, 0.15]              |
| Total Area <sub>intermyofibrillar</sub>               | 0.66 (0.60)                 | 0.62 (0.25)                 | -0.08                   | -0.58                | 0.511                | -0.24                | [-1.14, 0.39]              |
| Total Area <sub>subsarcolemmal</sub>                  | 0.98 (0.55)                 | 1.47 (0.66)                 | -0.5                    | -2.45                | <b>0.016</b>         | -1.03                | [-1.79, -0.07]             |
| Volume fraction <sub>intermyofibrillar</sub>          | 0.053<br>(0.019)            | 0.056<br>(0.017)            | 0                       | -0.68                | 0.442                | -0.28                | [-0.96, 0.51]              |

[illegible]
